# Supplementary material for: Choosing Wisely Campaign: Report Card and Achievable Benchmarks of Care for Children’s Hospitals
Source: Oxford University Press journal article supplement (doi:10.1542/hpeds.2017-0029), 2017-11-01
Supplement: hpeds_2017-0029supplementarydata.pdf [file hpeds_2017-0029supplementarydata.pdf]

## Supplemental Information

**Special Note:** Choosing Wisely is an initiative of the American Board of Internal Medicine (ABIM) Foundation and has not reviewed or endorsed this report.

### For all measures:

Patient Type: 0 - Inpatient; 3 - Observation  
 Severity Levels: 1, 2, 3 (Minor, Moderate, Major)  
 ICU Flag: ICU Flag = N

### Achievable Benchmarks of Care (ABC):

ABCs are derived benchmarks that: 1) represent a measurable level of excellence, 2) are attainable, and (3) are derived from data in an objective and reproducible fashion. The ABC for the measure is calculated based on the performance of the top decile, with adjustments for sample size by participant/site.

### *Asthma Population defined as:*

Age at Admit: Age in Years 3 thru 17  
 Length of Stay: LOS ≤ 5 days  
 Principal Dx (ICD): In Asthma Inclusion Codes list

### Asthma Inclusion Codes:

|       |                                                       |
|-------|-------------------------------------------------------|
| 49300 | Extrinsic asthma, unspecified                         |
| 49301 | Extrinsic asthma with status asthmaticus              |
| 49302 | Extrinsic asthma, with (acute) exacerbation           |
| 49310 | Intrinsic asthma, unspecified                         |
| 49311 | Intrinsic asthma with status asthmaticus              |
| 49312 | Intrinsic asthma, with (acute) exacerbation           |
| 49320 | Chronic obstructive asthma, unspecified               |
| 49321 | Chronic obstructive asthma, with status asthmaticus   |
| 49322 | Chronic obstructive asthma, with (acute) exacerbation |
| 49381 | Exercise induced bronchospasm                         |
| 49382 | Cough variant asthma                                  |
| 49390 | Asthma, unspecified, unspecified                      |
| 49391 | Asthma, unspecified type, with status asthmaticus     |
| 49392 | Asthma, unspecified, with (acute) exacerbation        |
| J4520 | Mild intermittent asthma, uncomplicated               |
| J4521 | Mild intermittent asthma with (acute) exacerbation    |
| J4522 | Mild intermittent asthma with status asthmaticus      |
| J4530 | Mild persistent asthma, uncomplicated                 |
| J4531 | Mild persistent asthma with (acute) exacerbation      |
| J4532 | Mild persistent asthma with status asthmaticus        |
| J4540 | Moderate persistent asthma, uncomplicated             |

**SUPPLEMENTAL FIGURE 4** PHIS Choosing Wisely measures report card definitions. Source: PHIS database. Dx, diagnosis; ICU, intensive care unit; SARS, severe acute respiratory syndrome.

|        |                                                      |
|--------|------------------------------------------------------|
| J4541  | Moderate persistent asthma with (acute) exacerbation |
| J4542  | Moderate persistent asthma with status asthmaticus   |
| J4550  | Severe persistent asthma, uncomplicated              |
| J4551  | Severe persistent asthma with (acute) exacerbation   |
| J4552  | Severe persistent asthma with status asthmaticus     |
| J45901 | Unspecified asthma with (acute) exacerbation         |
| J45902 | Unspecified asthma with status asthmaticus           |
| J45909 | Unspecified asthma, uncomplicated                    |
| J45990 | Exercise induced bronchospasm                        |
| J45991 | Cough variant asthma                                 |
| J45998 | Other asthma                                         |

**Chest Radiograph defined as: (Asthma/Bronchiolitis Measure #1)**

|        |                                     |
|--------|-------------------------------------|
| 433011 | Chest x-ray                         |
| 433111 | Chest posterior anterior (PA) x-ray |
| 433211 | Chest anterior posterior (AP) x-ray |
| 433311 | Chest PA and lateral x-ray          |
| 433411 | Chest AP and lateral x-ray          |
| 433511 | Chest lateral decubitus x-ray       |
| 433611 | Chest lateral x-ray                 |
| 433711 | Chest inspiration/expiration x-ray  |
| 433911 | Other specified chest x-ray         |

**Asthma Exclusions:**

- Dx Code (ICD) in Basic Exclusion List for Respiratory (See Appendix A)
- Dx Code (ICD) in Bronchiolitis inclusion codes list (466.11, 466.19, J21.0, J21.1, J21.8, J21.9)
- Dx Code (ICD) in Lower Tract Respiratory Infection inclusion codes list (See below)

***Bronchiolitis Population defined as:***

**Age at Admit:** Admit age  $\geq$  1 month and  $<$  1 year

**Length of Stay:** LOS  $\leq$  5 days

**Principal Dx (ICD):** In Bronchiolitis Inclusion Codes list

**Bronchiolitis Inclusion Codes:**

|       |                                                              |
|-------|--------------------------------------------------------------|
| 46611 | Acute bronchiolitis due to respiratory syncytial virus (RSV) |
| 46619 | Acute bronchiolitis due to other infectious organisms        |
| J210  | Acute bronchiolitis due to respiratory syncytial virus       |
| J211  | Acute bronchiolitis due to human metapneumovirus             |
| J218  | Acute bronchiolitis due to other specified organisms         |
| J219  | Acute bronchiolitis, unspecified                             |

**Relievers defined as: (Bronchiolitis Measure #2)**

|        |                   |
|--------|-------------------|
| 131321 | Epinephrine       |
| 181211 | Albuterol sulfate |

---

**SUPPLEMENTAL FIGURE 4** Continued.

|        |                                           |
|--------|-------------------------------------------|
| 181231 | Levalbuterol HCl                          |
| 181235 | Metaproterenol sulfate                    |
| 181245 | Terbutaline sulfate                       |
| 181251 | Pirbuterol acetate                        |
| 181311 | Ipratropium bromide                       |
| 181315 | Albuterol sulfate and ipratropium bromide |

**Bronchiolitis Exclusions:**

- Dx Code (ICD) in Basic Exclusion List for Respiratory (See Appendix A)
- Dx Code (ICD) in Asthma inclusion codes list
- Dx Code (ICD) in Lower Tract Respiratory Infection inclusion codes list (See below)

***Lower Respiratory Tract Infection (LRTI) defined as:***

**Age at Admit:** Admit age  $\geq$  1 month and  $<$  2 years  
**Principal Dx (ICD):** In LRTI Inclusion Codes list

**Lower Respiratory Tract Infection (LRTI) Inclusion Codes – Principal Dx (ICD):**

|       |                                                                |
|-------|----------------------------------------------------------------|
| 46611 | Acute bronchiolitis due to respiratory syncytial virus (RSV)   |
| 46619 | Acute bronchiolitis due to other infectious organisms          |
| 4800  | Pneumonia due to adenovirus                                    |
| 4801  | Pneumonia due to respiratory syncytial virus                   |
| 4802  | Pneumonia due to parainfluenza virus                           |
| 4803  | Pneumonia due to SARS-associated coronavirus                   |
| 4808  | Pneumonia due to other virus not elsewhere classified          |
| 4809  | Viral pneumonia, unspecified                                   |
| 481   | Pneumococcal pneumonia [Streptococcus pneumoniae pneumonia]    |
| 4820  | Pneumonia due to Klebsiella pneumoniae                         |
| 4821  | Pneumonia due to Pseudomonas                                   |
| 4822  | Pneumonia due to Hemophilus influenzae [H. influenzae]         |
| 48230 | Pneumonia due to unspecified Streptococcus                     |
| 48231 | Pneumonia due to Streptococcus, group A                        |
| 48232 | Pneumonia due to Streptococcus, group B                        |
| 48239 | Pneumonia due to other Streptococcus                           |
| 48240 | Pneumonia due to Staphylococcus, unspecified                   |
| 48241 | Methicillin susceptible pneumonia due to Staphylococcus aureus |
| 48242 | Methicillin resistant pneumonia due to Staphylococcus aureus   |
| 48249 | Other Staphylococcus pneumonia                                 |
| 48281 | Pneumonia due to anaerobes                                     |
| 48282 | Pneumonia due to Escherichia coli [E. coli]                    |
| 48283 | Pneumonia due to other gram-negative bacteria                  |
| 48284 | Legionnaires' disease                                          |

|        |                                                                                                            |
|--------|------------------------------------------------------------------------------------------------------------|
| 48289  | Pneumonia due to other specified bacteria                                                                  |
| 4829   | Bacterial pneumonia, unspecified                                                                           |
| 4830   | Pneumonia due to <i>Mycoplasma pneumoniae</i>                                                              |
| 4831   | Pneumonia due to <i>Chlamydia</i>                                                                          |
| 4838   | Pneumonia due to other specified organism                                                                  |
| 4841   | Pneumonia in cytomegalic inclusion disease                                                                 |
| 4843   | Pneumonia in whooping cough                                                                                |
| 4845   | Pneumonia in anthrax                                                                                       |
| 4846   | Pneumonia in aspergillosis                                                                                 |
| 4847   | Pneumonia in other systemic mycoses                                                                        |
| 4848   | Pneumonia in other infectious diseases classified elsewhere                                                |
| 485    | Bronchopneumonia, organism unspecified                                                                     |
| 486    | Pneumonia, organism unspecified                                                                            |
| 4870   | Influenza with pneumonia                                                                                   |
| A221   | Pulmonary anthrax                                                                                          |
| A3701  | Whooping cough due to <i>Bordetella pertussis</i> with pneumonia                                           |
| A3711  | Whooping cough due to <i>Bordetella parapertussis</i> with pneumonia                                       |
| A3781  | Whooping cough due to other <i>Bordetella</i> species with pneumonia                                       |
| A3791  | Whooping cough, unspecified species with pneumonia                                                         |
| A481   | Legionnaires' disease                                                                                      |
| B250   | Cytomegaloviral pneumonitis                                                                                |
| B440   | Invasive pulmonary aspergillosis                                                                           |
| J09X1  | Influenza due to identified novel influenza A virus with pneumonia                                         |
| J1000  | Influenza due to other identified influenza virus with unspecified type of pneumonia                       |
| J1001  | Influenza due to other identified influenza virus with the same other identified influenza virus pneumonia |
| J1008  | Influenza due to other identified influenza virus with other specified pneumonia                           |
| J1100  | Influenza due to unidentified influenza virus with unspecified type of pneumonia                           |
| J1108  | Influenza due to unidentified influenza virus with specified pneumonia                                     |
| J120   | Adenoviral pneumonia                                                                                       |
| J121   | Respiratory syncytial virus pneumonia                                                                      |
| J122   | Parainfluenza virus pneumonia                                                                              |
| J123   | Human metapneumovirus pneumonia                                                                            |
| J1281  | Pneumonia due to SARS-associated coronavirus                                                               |
| J1289  | Other viral pneumonia                                                                                      |
| J129   | Viral pneumonia, unspecified                                                                               |
| J13    | Pneumonia due to <i>Streptococcus pneumoniae</i>                                                           |
| J14    | Pneumonia due to <i>Hemophilus influenzae</i>                                                              |
| J150   | Pneumonia due to <i>Klebsiella pneumoniae</i>                                                              |
| J151   | Pneumonia due to <i>Pseudomonas</i>                                                                        |
| J1520  | Pneumonia due to staphylococcus, unspecified                                                               |
| J15211 | Pneumonia due to Methicillin susceptible <i>Staphylococcus aureus</i>                                      |

---

**SUPPLEMENTAL FIGURE 4** Continued.

|        |                                                              |
|--------|--------------------------------------------------------------|
| J15212 | Pneumonia due to Methicillin resistant Staphylococcus aureus |
| J1529  | Pneumonia due to other staphylococcus                        |
| J153   | Pneumonia due to streptococcus, group B                      |
| J154   | Pneumonia due to other streptococci                          |
| J155   | Pneumonia due to Escherichia coli                            |
| J156   | Pneumonia due to other aerobic Gram-negative bacteria        |
| J157   | Pneumonia due to Mycoplasma pneumoniae                       |
| J158   | Pneumonia due to other specified bacteria                    |
| J159   | Unspecified bacterial pneumonia                              |
| J160   | Chlamydial pneumonia                                         |
| J168   | Pneumonia due to other specified infectious organisms        |
| J17    | Pneumonia in diseases classified elsewhere                   |
| J180   | Bronchopneumonia, unspecified organism                       |
| J181   | Lobar pneumonia, unspecified organism                        |
| J182   | Hypostatic pneumonia, unspecified organism                   |
| J188   | Other pneumonia, unspecified organism                        |
| J189   | Pneumonia, unspecified organism                              |
| J210   | Acute bronchiolitis due to respiratory syncytial virus       |
| J211   | Acute bronchiolitis due to human metapneumovirus             |
| J218   | Acute bronchiolitis due to other specified organisms         |
| J219   | Acute bronchiolitis, unspecified                             |

**Systemic Steroids defined as: (LRTI Measure #3)**

|        |                    |
|--------|--------------------|
| 154035 | Dexamethasone      |
| 154063 | Hydrocortisone     |
| 154071 | Methylprednisolone |
| 154081 | Prednisolone       |
| 154083 | Prednisone         |

**Lower Respiratory Tract Infection (LRTI) Exclusions:**

- Dx Code (ICD) in Basic Exclusion List for Respiratory (See Appendix A)
- Dx Code (ICD) in list of Asthma Inclusion codes (See above)

***Gastroesophageal Reflux defined as:***

**Age at Admit:** Admit age <= 1 year

**Principal Dx (ICD):**

|        |                                                      |
|--------|------------------------------------------------------|
| 530.81 | Esophageal Reflux                                    |
| K21.9  | Gastro-esophageal reflux disease without esophagitis |

**Acid Suppressors defined as: (GER Measure #4)**

|        |                                     |
|--------|-------------------------------------|
| 147200 | Proton pump inhibitors, unspecified |
|--------|-------------------------------------|

---

**SUPPLEMENTAL FIGURE 4** Continued.

|        |                                        |
|--------|----------------------------------------|
| 147201 | Esomeprazole                           |
| 147203 | Dexlansoprazole                        |
| 147205 | Lansoprazole                           |
| 147211 | Pantoprazole sodium                    |
| 147215 | Omeprazole                             |
| 147221 | Rabeprazole                            |
| 147229 | Other specified proton pump inhibitors |
| 147100 | Histamine antagonists                  |
| 147101 | Cimetidine                             |
| 147105 | Famotidine                             |
| 147111 | Rantidine                              |
| 147115 | Nizatidine                             |
| 147129 | Other histamine antagonists            |

#### **Gastroesophageal (GER) Exclusions – Dx Code (ICD):**

|       |                                                                                                                      |
|-------|----------------------------------------------------------------------------------------------------------------------|
| 261   | Nutritional marasmus                                                                                                 |
| 262   | Other severe protein-calorie malnutrition                                                                            |
| 2630  | Malnutrition of moderate degree                                                                                      |
| 2631  | Malnutrition of mild degree                                                                                          |
| 2632  | Arrested development following protein-calorie malnutrition                                                          |
| 2638  | Other protein-calorie malnutrition                                                                                   |
| 2639  | Unspecified protein-calorie malnutrition                                                                             |
| 32720 | Organic sleep apnea, unspecified                                                                                     |
| 32721 | Primary central sleep apnea                                                                                          |
| 32723 | Obstructive sleep apnea (adult) (pediatric)                                                                          |
| 32727 | Central sleep apnea in conditions classified elsewhere                                                               |
| 32729 | Other organic sleep apnea                                                                                            |
| 53010 | Unspecified esophagitis                                                                                              |
| 53011 | Reflux esophagitis                                                                                                   |
| 53012 | Acute esophagitis                                                                                                    |
| 53013 | Eosinophilic esophagitis                                                                                             |
| 53019 | Other esophagitis                                                                                                    |
| 53311 | Acute peptic ulcer of unspecified site with perforation, with obstruction                                            |
| 53320 | Acute peptic ulcer of unspecified site with hemorrhage and perforation, without mention of obstruction               |
| 53321 | Acute peptic ulcer of unspecified site with hemorrhage and perforation, with obstruction                             |
| 53330 | Acute peptic ulcer of unspecified site without mention of hemorrhage and perforation, without mention of obstruction |
| 53331 | Acute peptic ulcer of unspecified site without mention of hemorrhage and perforation, with obstruction               |
| 53340 | Chronic or unspecified peptic ulcer of unspecified site with hemorrhage, without mention of obstruction              |
| 53341 | Chronic or unspecified peptic ulcer of unspecified site with hemorrhage, with obstruction                            |
| 53350 | Chronic or unspecified peptic ulcer of unspecified site with perforation, without mention of obstruction             |

---

**SUPPLEMENTAL FIGURE 4** Continued.

|       |                                                                                                                                                 |
|-------|-------------------------------------------------------------------------------------------------------------------------------------------------|
| 53351 | Chronic or unspecified peptic ulcer of unspecified site with perforation, with obstruction                                                      |
| 53360 | Chronic or unspecified peptic ulcer of unspecified site with hemorrhage and perforation, without mention of obstruction                         |
| 53361 | Chronic or unspecified peptic ulcer of unspecified site with hemorrhage and perforation, with obstruction                                       |
| 53370 | Chronic peptic ulcer of unspecified site without mention of hemorrhage or perforation, without mention of obstruction                           |
| 53371 | Chronic peptic ulcer of unspecified site without mention of hemorrhage or perforation, with obstruction                                         |
| 53390 | Peptic ulcer of unspecified site, unspecified as acute or chronic, without mention of hemorrhage or perforation, without mention of obstruction |
| 53391 | Peptic ulcer of unspecified site, unspecified as acute or chronic, without mention of hemorrhage or perforation, with obstruction               |
| 53500 | Acute gastritis, without mention of hemorrhage                                                                                                  |
| 53501 | Acute gastritis, with hemorrhage                                                                                                                |
| 53510 | Atrophic gastritis, without mention of hemorrhage                                                                                               |
| 53511 | Atrophic gastritis, with hemorrhage                                                                                                             |
| 53520 | Gastric mucosal hypertrophy, without mention of hemorrhage                                                                                      |
| 53521 | Gastric mucosal hypertrophy, with hemorrhage                                                                                                    |
| 53530 | Alcoholic gastritis, without mention of hemorrhage                                                                                              |
| 53531 | Alcoholic gastritis, with hemorrhage                                                                                                            |
| 53540 | Other specified gastritis, without mention of hemorrhage                                                                                        |
| 53541 | Other specified gastritis, with hemorrhage                                                                                                      |
| 53550 | Unspecified gastritis and gastroduodenitis, without mention of hemorrhage                                                                       |
| 53551 | Unspecified gastritis and gastroduodenitis, with hemorrhage                                                                                     |
| 53560 | Duodenitis, without mention of hemorrhage                                                                                                       |
| 53561 | Duodenitis, with hemorrhage                                                                                                                     |
| 53570 | Eosinophilic gastritis, without mention of hemorrhage                                                                                           |
| 53571 | Eosinophilic gastritis, with hemorrhage                                                                                                         |
| 77081 | Primary apnea of newborn                                                                                                                        |
| 77082 | Other apnea of newborn                                                                                                                          |
| 77934 | Failure to thrive in newborn                                                                                                                    |
| 78051 | Insomnia with sleep apnea, unspecified                                                                                                          |
| 78053 | Hypersomnia with sleep apnea, unspecified                                                                                                       |
| 78057 | Unspecified sleep apnea                                                                                                                         |
| 78341 | Failure to thrive                                                                                                                               |
| 78603 | Apnea                                                                                                                                           |
| 79982 | Apparent life threatening event in infant                                                                                                       |
| E41   | Nutritional marasmus                                                                                                                            |
| E42   | Marasmic kwashiorkor                                                                                                                            |
| E43   | Unspecified severe protein-calorie malnutrition                                                                                                 |
| E440  | Moderate protein-calorie malnutrition                                                                                                           |
| E441  | Mild protein-calorie malnutrition                                                                                                               |
| E45   | Retarded development following protein-calorie malnutrition                                                                                     |
| E46   | Unspecified protein-calorie malnutrition                                                                                                        |

---

**SUPPLEMENTAL FIGURE 4** Continued.

|       |                                                                                                    |
|-------|----------------------------------------------------------------------------------------------------|
| G4730 | Sleep apnea, unspecified                                                                           |
| G4731 | Primary central sleep apnea                                                                        |
| G4733 | Obstructive sleep apnea (adult) (pediatric)                                                        |
| G4737 | Central sleep apnea in conditions classified elsewhere                                             |
| G4739 | Other sleep apnea                                                                                  |
| K200  | Eosinophilic esophagitis                                                                           |
| K208  | Other esophagitis                                                                                  |
| K209  | Esophagitis, unspecified                                                                           |
| K210  | Gastro-esophageal reflux disease with esophagitis                                                  |
| K270  | Acute peptic ulcer, site unspecified, with hemorrhage                                              |
| K271  | Acute peptic ulcer, site unspecified, with perforation                                             |
| K272  | Acute peptic ulcer, site unspecified, with both hemorrhage and perforation                         |
| K273  | Acute peptic ulcer, site unspecified, without hemorrhage or perforation                            |
| K274  | Chronic or unspecified peptic ulcer, site unspecified, with hemorrhage                             |
| K275  | Chronic or unspecified peptic ulcer, site unspecified, with perforation                            |
| K276  | Chronic or unspecified peptic ulcer, site unspecified, with both hemorrhage and perforation        |
| K277  | Chronic peptic ulcer, site unspecified, without hemorrhage or perforation                          |
| K279  | Peptic ulcer, site unspecified, unspecified as acute or chronic, without hemorrhage or perforation |
| K2900 | Acute gastritis without bleeding                                                                   |
| K2901 | Acute gastritis with bleeding                                                                      |
| K2920 | Alcoholic gastritis without bleeding                                                               |
| K2921 | Alcoholic gastritis with bleeding                                                                  |
| K2930 | Chronic superficial gastritis without bleeding                                                     |
| K2931 | Chronic superficial gastritis with bleeding                                                        |
| K2940 | Chronic atrophic gastritis without bleeding                                                        |
| K2941 | Chronic atrophic gastritis with bleeding                                                           |
| K2950 | Unspecified chronic gastritis without bleeding                                                     |
| K2951 | Unspecified chronic gastritis with bleeding                                                        |
| K2960 | Other gastritis without bleeding                                                                   |
| K2961 | Other gastritis with bleeding                                                                      |
| K2970 | Gastritis, unspecified, without bleeding                                                           |
| K2971 | Gastritis, unspecified, with bleeding                                                              |
| K2980 | Duodenitis without bleeding                                                                        |
| K2981 | Duodenitis with bleeding                                                                           |
| K2990 | Gastroduodenitis, unspecified, without bleeding                                                    |
| K2991 | Gastroduodenitis, unspecified, with bleeding                                                       |
| K5281 | Eosinophilic gastritis or gastroenteritis                                                          |
| P283  | Primary sleep apnea of newborn                                                                     |
| P284  | Other apnea of newborn                                                                             |
| P926  | Failure to thrive in newborn                                                                       |
| R0681 | Apnea, not elsewhere classified                                                                    |

---

**SUPPLEMENTAL FIGURE 4** Continued.



- R6251 Failure to thrive (child)  
R6813 Apparent life threatening event in infant (ALTE)

### ***Appendix A: Basic Exclusion List for Respiratory***

- 261 Nutritional marasmus  
262 Other severe protein-calorie malnutrition  
2630 Malnutrition of moderate degree  
2631 Malnutrition of mild degree  
2638 Other protein-calorie malnutrition  
2639 Unspecified protein-calorie malnutrition  
2734 Alpha-1-antitrypsin deficiency  
2762 Acidosis  
27700 Cystic fibrosis without mention of meconium ileus  
27701 Cystic fibrosis with meconium ileus  
27702 Cystic fibrosis with pulmonary manifestations  
27703 Cystic fibrosis with gastrointestinal manifestations  
27709 Cystic fibrosis with other manifestations  
317 Mild intellectual disabilities  
3180 Moderate intellectual disabilities  
3181 Severe intellectual disabilities  
3182 Profound intellectual disabilities  
319 Unspecified intellectual disabilities  
32720 Organic sleep apnea, unspecified  
32721 Primary central sleep apnea  
32723 Obstructive sleep apnea (adult) (pediatric)  
32727 Central sleep apnea in conditions classified elsewhere  
32729 Other organic sleep apnea  
3430 Diplegic infantile cerebral palsy  
3431 Hemiplegic infantile cerebral palsy  
3432 Quadriplegic infantile cerebral palsy  
3433 Monoplegic infantile cerebral palsy  
3434 Infantile hemiplegia  
3438 Other specified infantile cerebral palsy  
3439 Infantile cerebral palsy, unspecified  
3481 Anoxic brain damage  
34830 Encephalopathy, unspecified  
34831 Metabolic encephalopathy  
34839 Other encephalopathy  
3489 Unspecified condition of brain  
490 Bronchitis, not specified as acute or chronic

|       |                                                                                   |
|-------|-----------------------------------------------------------------------------------|
| 496   | Chronic airway obstruction, not classified elsewhere                              |
| 5111  | Pleurisy with effusion, with mention of a bacterial cause other than tuberculosis |
| 5119  | Unspecified pleural effusion                                                      |
| 51661 | Neuroendocrine cell hyperplasia of infancy                                        |
| 51662 | Pulmonary interstitial glycogenosis                                               |
| 51663 | Surfactant mutations of the lung                                                  |
| 51664 | Alveolar capillary dysplasia with vein misalignment                               |
| 51669 | Other interstitial lung diseases of childhood                                     |
| 5168  | Other specified alveolar and parietoalveolar pneumonopathies                      |
| 5169  | Unspecified alveolar and parietoalveolar pneumonopathy                            |
| 51881 | Acute respiratory failure                                                         |
| 51882 | Other pulmonary insufficiency, not elsewhere classified                           |
| 51883 | Chronic respiratory failure                                                       |
| 51884 | Acute and chronic respiratory failure                                             |
| 51889 | Other diseases of lung not classified elsewhere                                   |
| 51911 | Acute bronchospasm                                                                |
| 52400 | Unspecified anomaly of jaw size                                                   |
| 52401 | Maxillary hyperplasia                                                             |
| 52402 | Mandibular hyperplasia                                                            |
| 52403 | Maxillary hypoplasia                                                              |
| 52404 | Mandibular hypoplasia                                                             |
| 52405 | Macrogenia                                                                        |
| 52406 | Microgenia                                                                        |
| 52407 | Excessive tuberosity of jaw                                                       |
| 52409 | Other specified anomaly of jaw size                                               |
| 52410 | Unspecified anomaly of relationship of jaw to cranial base                        |
| 52411 | Maxillary asymmetry                                                               |
| 52412 | Other jaw asymmetry                                                               |
| 52419 | Other specified anomaly of relationship of jaw to cranial base                    |
| 7450  | Common truncus                                                                    |
| 74510 | Complete transposition of great vessels                                           |
| 74511 | Double outlet right ventricle                                                     |
| 74512 | Corrected transposition of great vessels                                          |
| 74519 | Other transposition of great vessels                                              |
| 7452  | Tetralogy of Fallot                                                               |
| 7453  | Common ventricle                                                                  |
| 7454  | Ventricular septal defect                                                         |
| 7455  | Ostium secundum type atrial septal defect                                         |
| 74560 | Endocardial cushion defect, unspecified type                                      |
| 74561 | Ostium primum defect                                                              |
| 74569 | Other endocardial cushion defects                                                 |

---

**SUPPLEMENTAL FIGURE 4** Continued.

|       |                                                                       |
|-------|-----------------------------------------------------------------------|
| 7457  | Cor biloculare                                                        |
| 7458  | Other bulbus cordis anomalies and anomalies of cardiac septal closure |
| 7459  | Unspecified defect of septal closure                                  |
| 74600 | Congenital pulmonary valve anomaly, unspecified                       |
| 74601 | Atresia of pulmonary valve, congenital                                |
| 74602 | Stenosis of pulmonary valve, congenital                               |
| 74609 | Other congenital anomalies of pulmonary valve                         |
| 7461  | Tricuspid atresia and stenosis, congenital                            |
| 7462  | Ebstein's anomaly                                                     |
| 7463  | Congenital stenosis of aortic valve                                   |
| 7464  | Congenital insufficiency of aortic valve                              |
| 7465  | Congenital mitral stenosis                                            |
| 7466  | Congenital mitral insufficiency                                       |
| 7467  | Hypoplastic left heart syndrome                                       |
| 74681 | Subaortic stenosis, congenital                                        |
| 74682 | Cor triatriatum                                                       |
| 74683 | Infundibular pulmonic stenosis, congenital                            |
| 74684 | Obstructive anomalies of heart, congenital, not elsewhere classified  |
| 74685 | Coronary artery anomaly, congenital                                   |
| 74686 | Congenital heart block                                                |
| 74687 | Malposition of heart and cardiac apex                                 |
| 74689 | Other specified congenital anomalies of heart                         |
| 7469  | Unspecified congenital anomaly of heart                               |
| 7470  | Patent Ductus Arteriosus                                              |
| 74710 | Coarctation of aorta (preductal) (postductal)                         |
| 74720 | Congenital anomaly of aorta, unspecified                              |
| 74860 | Congenital anomaly of lung, unspecified                               |
| 74869 | Other congenital anomalies of lung                                    |
| 74900 | Cleft palate, unspecified                                             |
| 74901 | Unilateral, unspecified                                               |
| 74902 | Cleft palate, unilateral, incomplete                                  |
| 74903 | Cleft palate, bilateral, complete                                     |
| 74904 | Cleft palate, bilateral, incomplete                                   |
| 74910 | Cleft lip, unspecified                                                |
| 74911 | Cleft lip, unilateral, complete                                       |
| 74912 | Cleft lip, unilateral, incomplete                                     |
| 74913 | Cleft lip, bilateral, complete                                        |
| 74914 | Cleft lip, bilateral, incomplete                                      |
| 74920 | Cleft palate with cleft lip, unspecified                              |
| 74921 | Cleft palate with cleft lip, unilateral, complete                     |
| 74922 | Cleft palate with cleft lip, unilateral, incomplete                   |

|       |                                                             |
|-------|-------------------------------------------------------------|
| 74923 | Cleft palate with cleft lip, bilateral, complete            |
| 74924 | Cleft palate with cleft lip, bilateral, incomplete          |
| 74925 | Other combinations of cleft palate with cleft lip           |
| 7560  | Congenital anomalies of skull and face bones                |
| 7678  | Other specified birth trauma                                |
| 76870 | Hypoxic-ischemic encephalopathy, unspecified                |
| 76871 | Mild hypoxic-ischemic encephalopathy                        |
| 76872 | Moderate hypoxic-ischemic encephalopathy                    |
| 76873 | Severe hypoxic-ischemic encephalopathy                      |
| 7707  | Chronic respiratory disease arising in the perinatal period |
| 77081 | Primary apnea of newborn                                    |
| 77082 | Other apnea of newborn                                      |
| 77934 | Failure to thrive in newborn                                |
| 78051 | Insomnia with sleep apnea, unspecified                      |
| 78053 | Hypersomnia with sleep apnea, unspecified                   |
| 78057 | Unspecified sleep apnea                                     |
| 78341 | Failure to thrive                                           |
| 78603 | Apnea                                                       |
| V440  | Tracheostomy status                                         |
| V550  | Attention to tracheostomy                                   |
| E41   | Nutritional marasmus                                        |
| E42   | Marasmic kwashiorkor                                        |
| E43   | Unspecified severe protein-calorie malnutrition             |
| E440  | Moderate protein-calorie malnutrition                       |
| E441  | Mild protein-calorie malnutrition                           |
| E46   | Unspecified protein-calorie malnutrition                    |
| E840  | Cystic fibrosis with pulmonary manifestations               |
| E8411 | Meconium ileus in cystic fibrosis                           |
| E8419 | Cystic fibrosis with other intestinal manifestations        |
| E848  | Cystic fibrosis with other manifestations                   |
| E849  | Cystic fibrosis, unspecified                                |
| E872  | Acidosis                                                    |
| E8801 | Alpha-1-antitrypsin deficiency                              |
| F70   | Mild intellectual disabilities                              |
| F71   | Moderate intellectual disabilities                          |
| F72   | Severe intellectual disabilities                            |
| F73   | Profound intellectual disabilities                          |
| F78   | Other intellectual disabilities                             |
| F79   | Unspecified intellectual disabilities                       |
| G4730 | Sleep apnea, unspecified                                    |
| G4731 | Primary central sleep apnea                                 |

---

**SUPPLEMENTAL FIGURE 4** Continued.

|        |                                                                                        |
|--------|----------------------------------------------------------------------------------------|
| G4733  | Obstructive sleep apnea (adult) (pediatric)                                            |
| G4737  | Central sleep apnea in conditions classified elsewhere                                 |
| G4739  | Other sleep apnea                                                                      |
| G800   | Spastic quadriplegic cerebral palsy                                                    |
| G801   | Spastic diplegic cerebral palsy                                                        |
| G802   | Spastic hemiplegic cerebral palsy                                                      |
| G803   | Athetoid cerebral palsy                                                                |
| G804   | Ataxic cerebral palsy                                                                  |
| G808   | Other cerebral palsy                                                                   |
| G809   | Cerebral palsy, unspecified                                                            |
| G931   | Anoxic brain damage, not elsewhere classified                                          |
| G9340  | Encephalopathy, unspecified                                                            |
| G9341  | Metabolic encephalopathy                                                               |
| G9349  | Other encephalopathy                                                                   |
| G939   | Disorder of brain, unspecified                                                         |
| I6783  | Posterior reversible encephalopathy syndrome                                           |
| J40    | Bronchitis, not specified as acute or chronic                                          |
| J449   | Chronic obstructive pulmonary disease, unspecified                                     |
| J80    | Acute respiratory distress syndrome                                                    |
| J8409  | Other alveolar and parieto-alveolar conditions                                         |
| J8483  | Surfactant mutations of the lung                                                       |
| J84841 | Neuroendocrine cell hyperplasia of infancy                                             |
| J84842 | Pulmonary interstitial glycogenosis                                                    |
| J84843 | Alveolar capillary dysplasia with vein misalignment                                    |
| J84848 | Other interstitial lung diseases of childhood                                          |
| J8489  | Other specified interstitial pulmonary diseases                                        |
| J849   | Interstitial pulmonary disease, unspecified                                            |
| J90    | Pleural effusion, not elsewhere classified                                             |
| J918   | Pleural effusion in other conditions classified elsewhere                              |
| J9600  | Acute respiratory failure, unspecified whether with hypoxia or hypercapnia             |
| J9601  | Acute respiratory failure with hypoxia                                                 |
| J9602  | Acute respiratory failure with hypercapnia                                             |
| J9610  | Chronic respiratory failure, unspecified whether with hypoxia or hypercapnia           |
| J9611  | Chronic respiratory failure with hypoxia                                               |
| J9612  | Chronic respiratory failure with hypercapnia                                           |
| J9620  | Acute and chronic respiratory failure, unspecified whether with hypoxia or hypercapnia |
| J9621  | Acute and chronic respiratory failure with hypoxia                                     |
| J9622  | Acute and chronic respiratory failure with hypercapnia                                 |
| J9690  | Respiratory failure, unspecified, unspecified whether with hypoxia or hypercapnia      |
| J9691  | Respiratory failure, unspecified with hypoxia                                          |
| J9692  | Respiratory failure, unspecified with hypercapnia                                      |

|       |                                                                             |
|-------|-----------------------------------------------------------------------------|
| J9801 | Acute bronchospasm                                                          |
| J984  | Other disorders of lung                                                     |
| M2600 | Unspecified anomaly of jaw size                                             |
| M2601 | Maxillary hyperplasia                                                       |
| M2602 | Maxillary hypoplasia                                                        |
| M2603 | Mandibular hyperplasia                                                      |
| M2604 | Mandibular hypoplasia                                                       |
| M2605 | Macrogenia                                                                  |
| M2606 | Microgenia                                                                  |
| M2607 | Excessive tuberosity of jaw                                                 |
| M2609 | Other specified anomalies of jaw size                                       |
| M2610 | Unspecified anomaly of jaw-cranial base relationship                        |
| M2611 | Maxillary asymmetry                                                         |
| M2612 | Other jaw asymmetry                                                         |
| M2619 | Other specified anomalies of jaw-cranial base relationship                  |
| P150  | Birth injury to liver                                                       |
| P151  | Birth injury to spleen                                                      |
| P152  | Sternomastoid injury due to birth injury                                    |
| P153  | Birth injury to eye                                                         |
| P154  | Birth injury to face                                                        |
| P155  | Birth injury to external genitalia                                          |
| P158  | Other specified birth injuries                                              |
| P159  | Birth injury, unspecified                                                   |
| P270  | Wilson-Mikity syndrome                                                      |
| P271  | Bronchopulmonary dysplasia originating in the perinatal period              |
| P278  | Other chronic respiratory diseases originating in the perinatal period      |
| P279  | Unspecified chronic respiratory disease originating in the perinatal period |
| P283  | Primary sleep apnea of newborn                                              |
| P284  | Other apnea of newborn                                                      |
| P9160 | Hypoxic ischemic encephalopathy [HIE], unspecified                          |
| P9161 | Mild hypoxic ischemic encephalopathy [HIE]                                  |
| P9162 | Moderate hypoxic ischemic encephalopathy [HIE]                              |
| P9163 | Severe hypoxic ischemic encephalopathy [HIE]                                |
| P926  | Failure to thrive in newborn                                                |
| Q200  | Common arterial trunk                                                       |
| Q201  | Double outlet right ventricle                                               |
| Q202  | Double outlet left ventricle                                                |
| Q203  | Discordant ventriculoarterial connection                                    |
| Q204  | Double inlet ventricle                                                      |
| Q205  | Discordant atrioventricular connection                                      |
| Q208  | Other congenital malformations of cardiac chambers and connections          |

---

**SUPPLEMENTAL FIGURE 4** Continued.

|      |                                                                          |
|------|--------------------------------------------------------------------------|
| Q209 | Congenital malformation of cardiac chambers and connections, unspecified |
| Q210 | Ventricular septal defect                                                |
| Q211 | Atrial septal defect                                                     |
| Q212 | Atrioventricular septal defect                                           |
| Q213 | Tetralogy of Fallot                                                      |
| Q214 | Aortopulmonary septal defect                                             |
| Q218 | Other congenital malformations of cardiac septa                          |
| Q219 | Congenital malformation of cardiac septum, unspecified                   |
| Q220 | Pulmonary valve atresia                                                  |
| Q221 | Congenital pulmonary valve stenosis                                      |
| Q222 | Congenital pulmonary valve insufficiency                                 |
| Q223 | Other congenital malformations of pulmonary valve                        |
| Q225 | Ebstein's anomaly                                                        |
| Q226 | Hypoplastic right heart syndrome                                         |
| Q228 | Other congenital malformations of tricuspid valve                        |
| Q229 | Congenital malformation of tricuspid valve, unspecified                  |
| Q230 | Congenital stenosis of aortic valve                                      |
| Q231 | Congenital insufficiency of aortic valve                                 |
| Q232 | Congenital mitral stenosis                                               |
| Q233 | Congenital mitral insufficiency                                          |
| Q234 | Hypoplastic left heart syndrome                                          |
| Q238 | Other congenital malformations of aortic and mitral valves               |
| Q239 | Congenital malformation of aortic and mitral valves, unspecified         |
| Q240 | Dextrocardia                                                             |
| Q241 | Levocardia                                                               |
| Q242 | Cor triatriatum                                                          |
| Q243 | Pulmonary infundibular stenosis                                          |
| Q244 | Congenital subaortic stenosis                                            |
| Q245 | Malformation of coronary vessels                                         |
| Q246 | Congenital heart block                                                   |
| Q248 | Other specified congenital malformations of heart                        |
| Q249 | Congenital malformation of heart, unspecified                            |
| Q250 | Patent ductus arteriosus                                                 |
| Q251 | Coarctation of aorta                                                     |
| Q252 | Atresia of aorta                                                         |
| Q253 | Supravalvular aortic stenosis                                            |
| Q254 | Other congenital malformations of aorta                                  |
| Q331 | Accessory lobe of lung                                                   |
| Q335 | Ectopic tissue in lung                                                   |
| Q338 | Other congenital malformations of lung                                   |
| Q339 | Congenital malformation of lung, unspecified                             |

|       |                                                                  |
|-------|------------------------------------------------------------------|
| Q351  | Cleft hard palate                                                |
| Q353  | Cleft soft palate                                                |
| Q357  | Cleft uvula                                                      |
| Q359  | Cleft palate, unspecified                                        |
| Q360  | Cleft lip, bilateral                                             |
| Q361  | Cleft lip, median                                                |
| Q369  | Cleft lip, unilateral                                            |
| Q370  | Cleft hard palate with bilateral cleft lip                       |
| Q371  | Cleft hard palate with unilateral cleft lip                      |
| Q372  | Cleft soft palate with bilateral cleft lip                       |
| Q373  | Cleft soft palate with unilateral cleft lip                      |
| Q374  | Cleft hard and soft palate with bilateral cleft lip              |
| Q375  | Cleft hard and soft palate with unilateral cleft lip             |
| Q378  | Unspecified cleft palate with bilateral cleft lip                |
| Q379  | Unspecified cleft palate with unilateral cleft lip               |
| Q750  | Craniosynostosis                                                 |
| Q752  | Hypertelorism                                                    |
| Q758  | Other specified congenital malformations of skull and face bones |
| Q759  | Congenital malformation of skull and face bones, unspecified     |
| R0681 | Apnea, not elsewhere classified                                  |
| R6251 | Failure to thrive (child)                                        |
| Z430  | Encounter for attention to tracheostomy                          |
| Z930  | Tracheostomy status                                              |

---

**SUPPLEMENTAL FIGURE 4** Continued.
